# Supplementary material
Source: Copernicus journal article supplement (doi:10.5194/egusphere-2026-3431)
Supplement: Supplementary file 1 [file egusphere-2026-3431-supplement.pdf]

# **A low-dimensional framework for interpreting Northern Hemisphere winter extratropical precipitation trends**

Ha-Rim Kim<sup>1</sup>, Changhyun Yoo<sup>2\*</sup>, Hyodae Seo<sup>3</sup>, and Baek-Min Kim<sup>4</sup>

5 <sup>1</sup>Institute of Sustainable Earth and Environmental Dynamics, Pukyong National University, Busan, 48513, Republic of Korea

<sup>2</sup>Department of Climate and Energy Systems Engineering, Ewha Womans University, Seoul, 03760, Republic of Korea

<sup>3</sup>Department of Oceanography, University of Hawai'i at Manoa, Honolulu, HI 96822, USA

<sup>4</sup>Division of Earth Environmental System Science, Pukyong National University, Busan, 48513, Republic of Korea

10 *Correspondence to:* Changhyun Yoo (cyoo@ewha.ac.kr)

## **Contents of this file**

Supplementary Table 1

Supplementary Figures 1–4

Supplementary Table 1. Summary of CMIP6 models used for historical and SSP5–8.5 simulations in this study.

| CMIP6                 |                 |                   |                       |                               |                     |                  |                   |                       |                               |
|-----------------------|-----------------|-------------------|-----------------------|-------------------------------|---------------------|------------------|-------------------|-----------------------|-------------------------------|
| Historical Simulation |                 |                   |                       |                               | SSP5-8.5 Simulation |                  |                   |                       |                               |
| No.                   | Model Name      | Country           | Horizontal Resolution | Reference                     | No.                 | Model Name       | Country           | Horizontal Resolution | Reference                     |
| 1                     | CanESM5         | Canada            | 2.81° × 2.81°         | Swart et al. (2019)           | 1                   | CanESM5          | Canada            | 2.81° × 2.81°         | Swart et al. (2019)           |
| 2                     | FGOALS-g3       | China             | 2° × 2.25°            | Li et al. (2019)              | 2                   | ACCESS-CM2       | Australia         | 1.88° × 1.25°         | Dix et al. (2019)             |
| 3                     | INM-CM4-8       | Russia            | 2° × 1.5°             | Volodin et al. (2019)         | 3                   | ACCESS-ESM1-5    |                   | 1.88° × 1.25°         | Ziehn et al. (2019)           |
| 4                     | GFDL-CM4        | USA               | 1.25° × 1°            | Guo et al. (2018)             | 4                   | AWI-CM-1-1-MR    | Germany           | 0.94° × 0.94°         | Semmler et al. (2019)         |
| 5                     | CESM2           |                   | 1.25° × 0.94°         | Danabasoglu and Gokhan (2019) | 5                   | BCC-CSM2-MR      | China             | 1.13° × 1.13°         | Xin et al. (2019)             |
| 6                     | CESM2-FV2       |                   | 2.5° × 1.9°           |                               | 6                   | CESM2-WACCM      | USA               | 1.25° × 0.94°         | Danabasoglu and Gokhan (2019) |
| 7                     | CESM2-WACCM     |                   | 1.25° × 0.94°         |                               | 7                   | EC-Earth3        | Europe            | 0.7° × 0.7°           | EC-Earth (2019)               |
| 8                     | ACCESS-CM2      | Australia         | 1.88° × 1.25°         | Martin et al. (2019)          | 8                   | EC-Earth3-Veg    |                   | 0.7° × 0.7°           |                               |
| 9                     | AWI-ESM-1-1-LR  | Germany           | 1.88° × 1.88°         | Danek et al. (2020)           | 9                   | EC-Earth3-CC     |                   | 0.7° × 0.7°           |                               |
| 10                    | MPI-ESM-1-2-HAM |                   | 1.88° × 1.88°         | Neubauer et al. (2019)        | 10                  | EC-Earth3-Veg-LR | 1.13° × 1.13°     | EC-Earth (2020)       |                               |
| 11                    | MPI-ESM1-2-HR   |                   | 0.94° × 0.94°         | Jungclaus et al. (2019)       | 11                  | INM-CM4-8        | Russia            | 2° × 1.5°             | Volodin et al. (2019)         |
| 12                    | MPI-ESM1-2-LR   |                   | 1.88° × 1.88°         | Wieners et al. (2019)         | 12                  | INM-CM5-0        | 2° × 1.5°         |                       |                               |
| 13                    | EC-Earth3       | Europe            | 0.7° × 0.7°           | EC-Earth (2019)               | 13                  | IPSL-CM6A-LR     | France            | 2.5° × 1.26°          | Boucher et al. (2019)         |
| 14                    | IITM-ESM        | India             | 1.88° × 1.9°          | Choudhury et al. (2019)       | 14                  | MIROC6           | Japan             | 1.4° × 1.4°           | Shiogama et al. (2019)        |
| 15                    | IPSL-CM6A-LR    | France            | 2.5° × 1.26°          | Boucher et al. (2019)         | 15                  | MRI-ESM2-0       |                   | 1.13° × 1.13°         | Yukimoto et al. (2019)        |
| 16                    | MIROC6          | Japan             | 1.4° × 1.4°           | Tatebe and Watanabe (2018)    | 16                  | NorESM2-LM       | Norway            | 2.5° × 1.9°           | Seland et al. (2019)          |
| 17                    | MRI-ESM2-0      |                   | 1.13° × 1.13°         | Yukimoto et al. (2019)        | 17                  | NorESM2-MM       |                   | 1.25° × 0.94          | Bentsen et al. (2019)         |
| 18                    | NorESM2-LM      | Norway            | 2.5° × 1.9°           | Seland et al. (2020)          | 18                  | TaiESM1          | Chinese Taipei    | 1.25° × 0.2°          | Lee et al. (2020)             |
| 19                    | NorESM2-MM      |                   | 1.25° × 0.94°         | Bentsen et al. (2019)         | 19                  | KACE-1-0-G       | Republic of Korea | 1.88° × 1.25°         | Byun et al. (2019)            |
| 20                    | TaiESM1         | Chinese Taipei    | 1.25° × 0.2°          | Wang et al. (2021)            |                     |                  |                   |                       |                               |
| 21                    | KACE-1-0-G      | Republic of Korea | 1.88° × 1.25°         | Byun et al. (2019)            |                     |                  |                   |                       |                               |

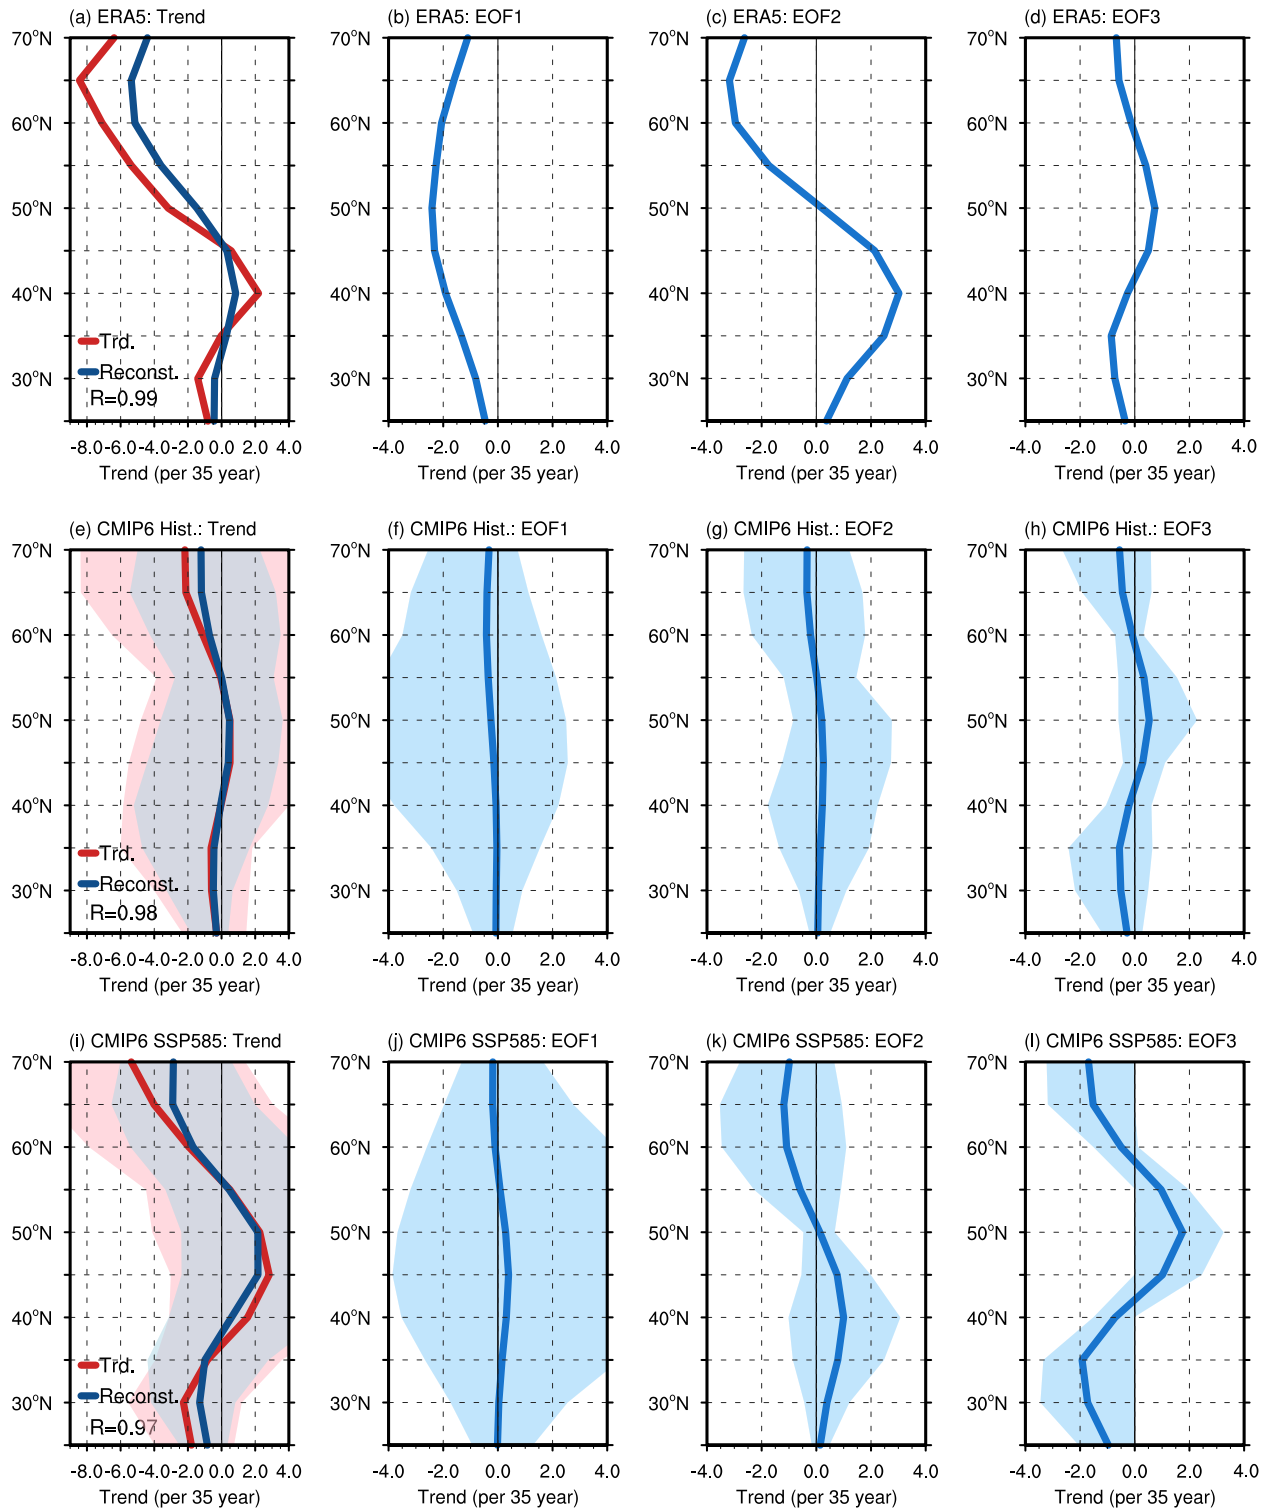

20 **Supplementary Figure 1. Zonal-mean profiles of 500-hPa geopotential height trends and their dynamical reconstructions.**  
 21 Zonal-mean profiles are shown for (a–d) ERA5 (1979–2014), (e–h) the CMIP6 historical multi-model mean (MMM; 21 models,  
 22 1979–2014), and (i–l) the CMIP6 SSP585 MMM (19 models, 2015–2100). The first column (a, e, i) compares the original 500-  
 23 hPa geopotential height (Z500) trends (red) with the dynamical reconstructions (blue) obtained by summing all decomposed  
 24 Z500 activity components (transient, stationary, and interaction), with pattern correlation coefficients (R) shown in each panel.

25 The remaining columns show the Z500 trend contributions associated with (b, f, j) EOF1, (c, g, k) EOF2, and (d, h, l) EOF3.  
26 Shading in the CMIP6 rows indicates the intermodel spread (minimum to maximum) across individual models.

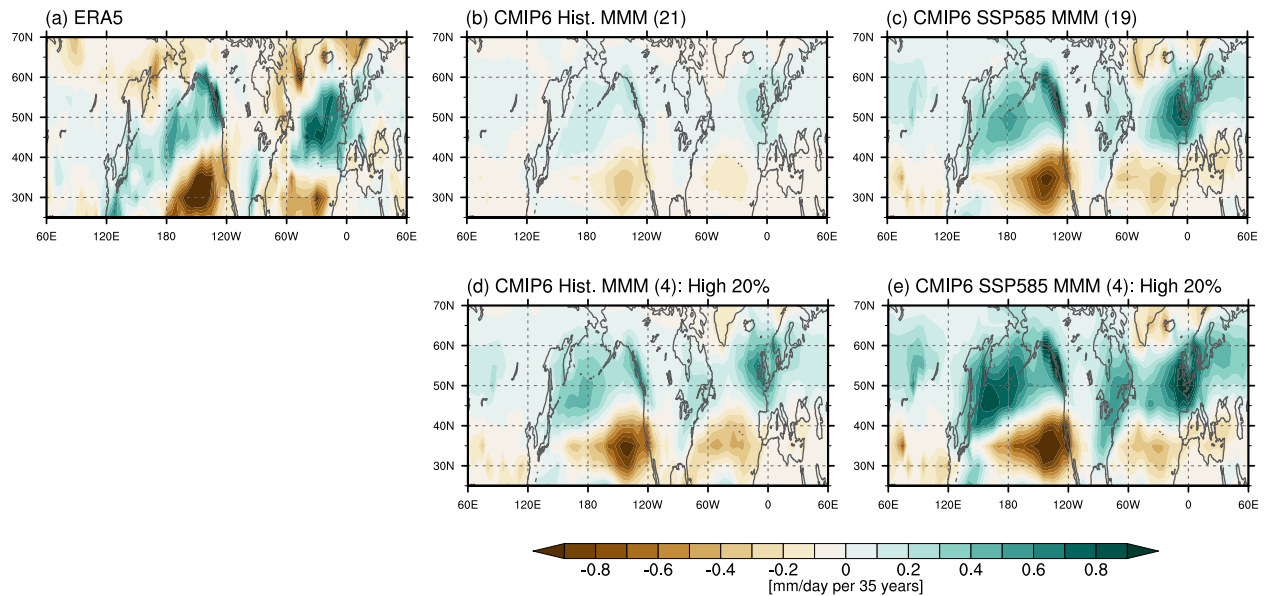

27

28 **Supplementary Figure 2. Induced total precipitation trend reconstructed from all decomposed dynamical components.**  
 29 Spatial distributions show the induced total precipitation trend obtained by summing the precipitation-trend contributions from all  
 30 decomposed 500-hPa geopotential-height (Z500) activity components (transient, stationary, and interaction). Results are shown  
 31 for (a) ERA5 (1979–2014), (b) the CMIP6 historical multi-model mean (MMM; 21 models, 1979–2014), and (c) the CMIP6  
 32 SSP585 MMM (19 models, 2015–2100). Panels (d) and (e) show the same quantity for the high-PROJ subsets, consisting of four  
 33 models selected from the top ~20% ranked by PROJ score in the historical and SSP585 ensembles, respectively. Shading  
 34 indicates the trend magnitude ( $\text{mm day}^{-1}$  per 35 years).

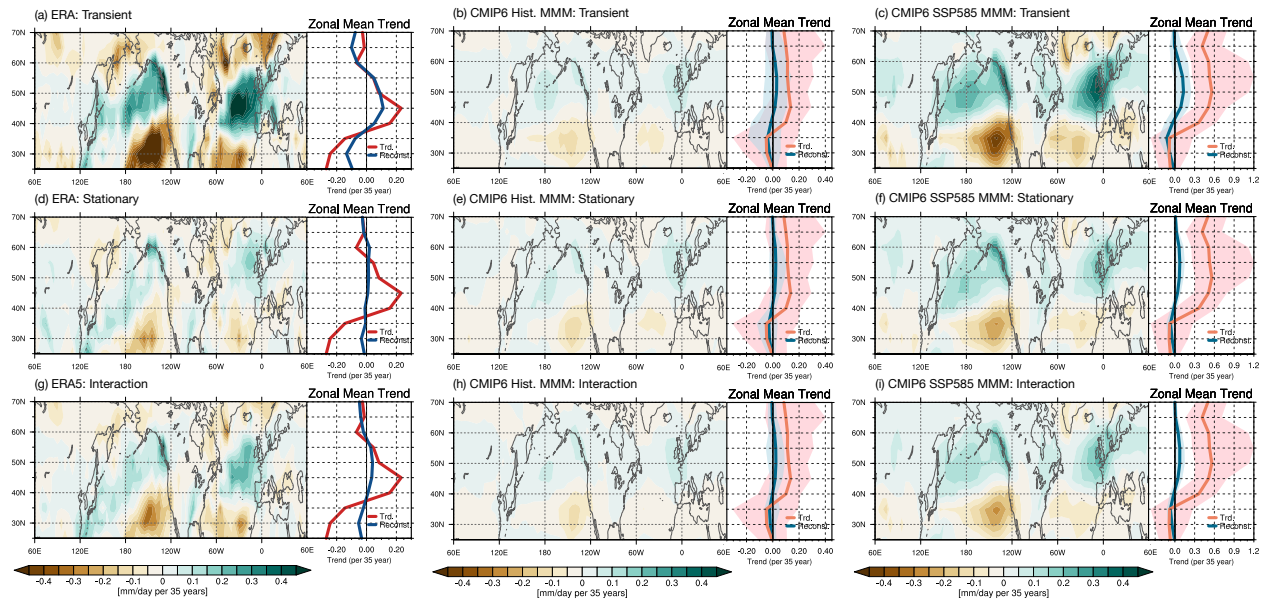

35

36 **Supplementary Figure 3. Spatial patterns and zonal-mean profiles of decomposed dynamical contributions to total**  
 37 **precipitation trends.** Each panel shows the total precipitation-trend contribution associated with the (a)–(c) transient, (d)–(f)  
 38 stationary, and (g)–(i) interaction components. For each component, the left subpanel shows the spatial pattern, and the right  
 39 subpanel shows the corresponding zonal-mean profile. Columns show (a, d, g) ERA5 (1979–2014), (b, e, h) the CMIP6 historical  
 40 MMM (21 models, 1979–2014), and (c, f, i) the CMIP6 SSP585 MMM (19 models, 2015–2100). In the zonal-mean subpanels,  
 41 solid curves denote the component-wise trend (“Trd.”) and the corresponding circulation-based reconstruction (“Reconst.”).  
 42 Shading in the CMIP6 zonal-mean subpanels indicates the intermodel range (minimum to maximum). Trend units are  $\text{mm day}^{-1}$   
 43 per 35 years.

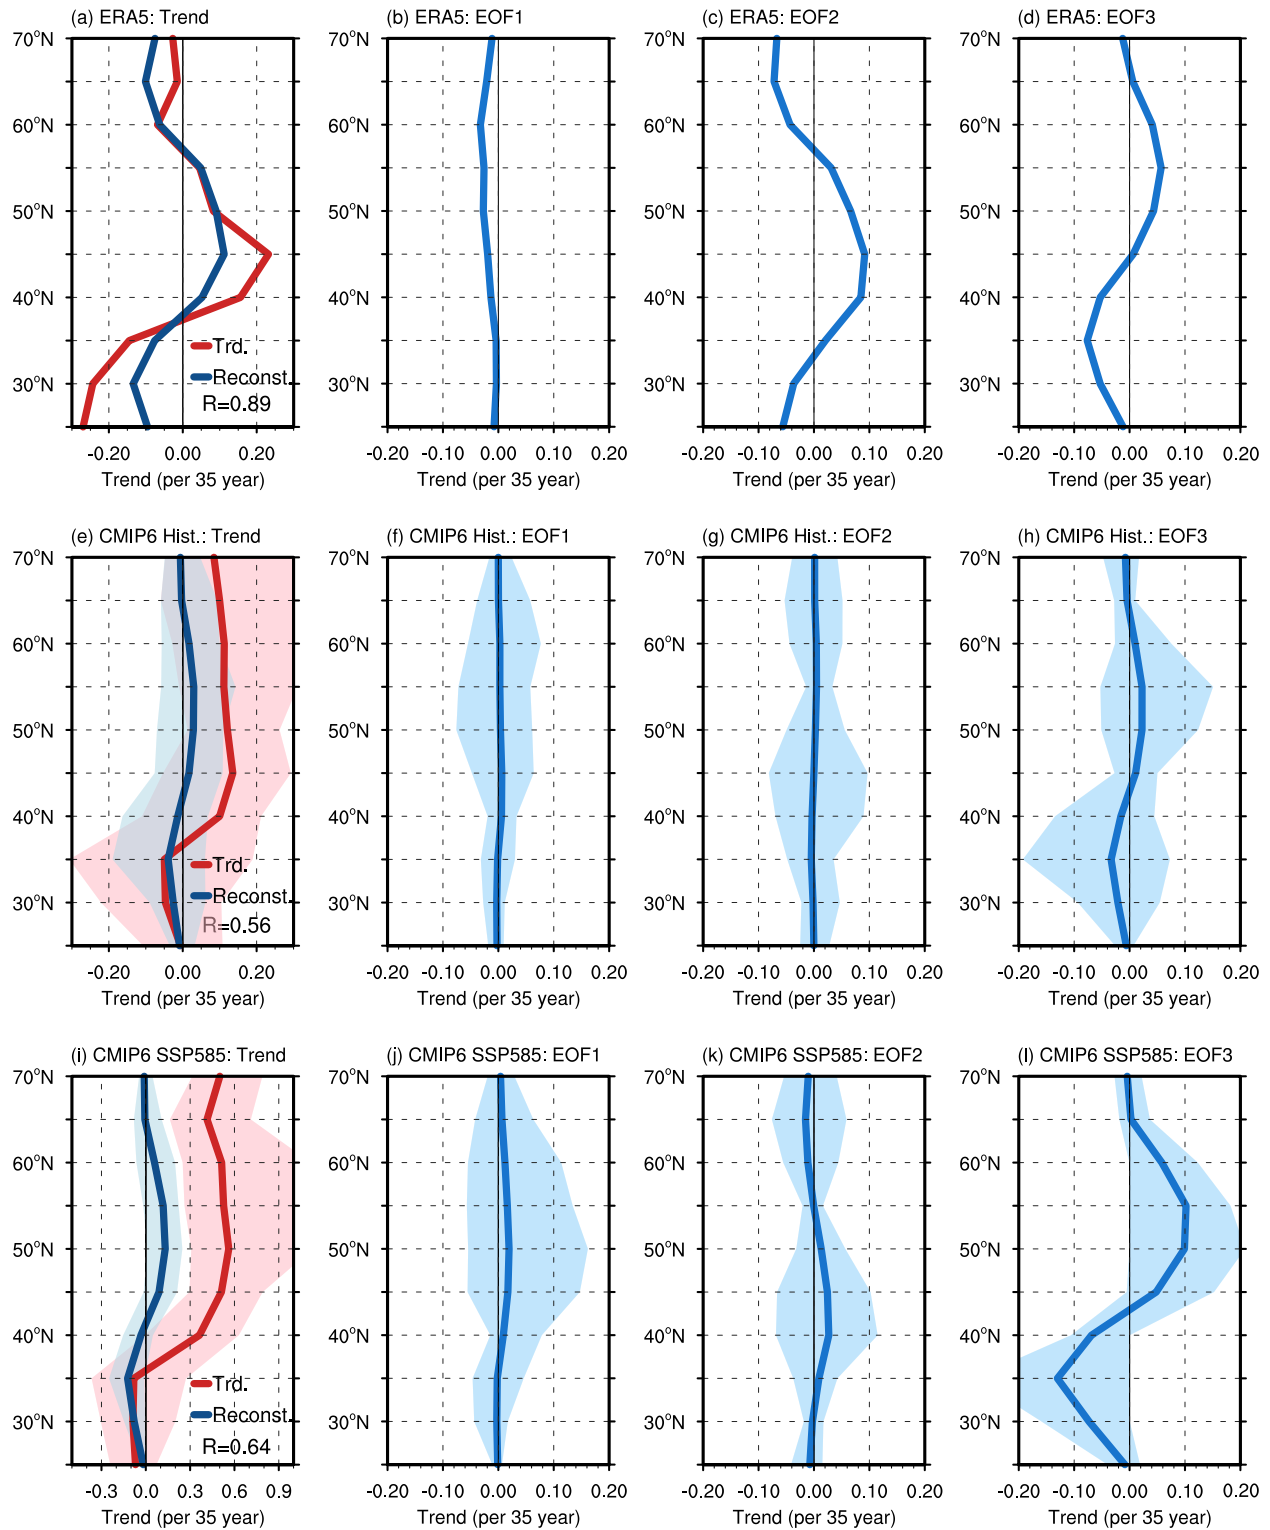

44

45 **Supplementary Figure 4. Zonal-mean profiles of transient-induced total precipitation trends and EOF-based**  
 46 **reconstructions.** Zonal-mean profiles are shown for (a)–(d) ERA5 (1979–2014), (e)–(h) the CMIP6 historical MMM (21 models,  
 47 1979–2014), and (i)–(l) the CMIP6 SSP585 MMM (19 models, 2015–2100). The first column (a, e, i) compares the transient-  
 48 induced total precipitation trend (“Trd.”; red) with its EOF-based reconstruction (“Reconst.”; blue) obtained by summing EOF1–  
 49 EOF3 contributions; pattern correlation coefficients (R) are shown in each panel. The remaining columns show the zonal-mean

50 contributions associated with EOF1 (b, f, j), EOF2 (c, g, k), and EOF3 (d, h, l). Shading in the CMIP6 rows indicates the  
51 intermodel range (minimum to maximum). Trend units are  $\text{mm day}^{-1}$  per 35 years.

52

53
